# Supplementary material
Source: publisher figshare collection journal article supplement (https://acs.figshare.com/ndownloader/files/4565314)
Supplement: Supplementary file 1 [file 4565314]

data_17a

_audit_creation_method            SHELXL-97
_chemical_name_systematic
;
 ?
;
_chemical_name_common             ?
_chemical_melting_point           ?
_chemical_formula_moiety          'C13 H15 N2 O, C F3 O3 S'
_chemical_formula_sum
 'C14 H15 F3 N2 O4 S'
_chemical_formula_weight          364.34

loop_
 _atom_type_symbol
 _atom_type_description
 _atom_type_scat_dispersion_real
 _atom_type_scat_dispersion_imag
 _atom_type_scat_source
 'C'  'C'   0.0033   0.0016
 'International Tables Vol C Tables 4.2.6.8 and 6.1.1.4'
 'H'  'H'   0.0000   0.0000
 'International Tables Vol C Tables 4.2.6.8 and 6.1.1.4'
 'N'  'N'   0.0061   0.0033
 'International Tables Vol C Tables 4.2.6.8 and 6.1.1.4'
 'O'  'O'   0.0106   0.0060
 'International Tables Vol C Tables 4.2.6.8 and 6.1.1.4'
 'F'  'F'   0.0171   0.0103
 'International Tables Vol C Tables 4.2.6.8 and 6.1.1.4'
 'S'  'S'   0.1246   0.1234
 'International Tables Vol C Tables 4.2.6.8 and 6.1.1.4'

_symmetry_cell_setting            monoclinic
_symmetry_space_group_name_H-M    P2(1)/c
_symmetry_space_group_name_Hall   '-P 2ybc'

loop_
 _symmetry_equiv_pos_as_xyz
 'x, y, z'
 '-x, y+1/2, -z+1/2'
 '-x, -y, -z'
 'x, -y-1/2, z-1/2'

_cell_length_a                    6.6746(12)
_cell_length_b                    22.837(4)
_cell_length_c                    10.1575(18)
_cell_angle_alpha                 90.00
_cell_angle_beta                  94.556(3)
_cell_angle_gamma                 90.00
_cell_volume                      1543.4(5)
_cell_formula_units_Z             4
_cell_measurement_temperature     150(2)
_cell_measurement_reflns_used     3452
_cell_measurement_theta_min       2.20
_cell_measurement_theta_max       27.46

_exptl_crystal_description        block
_exptl_crystal_colour             'pale yellow'
_exptl_crystal_size_max           0.31
_exptl_crystal_size_mid           0.16
_exptl_crystal_size_min           0.09
_exptl_crystal_density_meas       ?
_exptl_crystal_density_diffrn     1.568
_exptl_crystal_density_method     'not measured'
_exptl_crystal_F_000              752
_exptl_absorpt_coefficient_mu     0.266
_exptl_absorpt_correction_type    multi-scan
_exptl_absorpt_correction_T_min   0.922
_exptl_absorpt_correction_T_max   0.977
_exptl_absorpt_process_details    'SADABS v2.10, Sheldrick, G.M., (2003)'

_exptl_special_details
;
 ?
;

_diffrn_ambient_temperature       150(2)
_diffrn_radiation_wavelength      0.71073
_diffrn_radiation_type            MoK\a
_diffrn_radiation_source          'sealed tube'
_diffrn_radiation_monochromator   graphite
_diffrn_measurement_device_type   'Bruker SMART 1000 CCD diffractometer'
_diffrn_measurement_method        '\w rotation with narrow frames'
_diffrn_detector_area_resol_mean  ?
_diffrn_standards_number          0
_diffrn_standards_interval_count  ?
_diffrn_standards_interval_time   ?
_diffrn_standards_decay_%         0
_diffrn_reflns_number             10854
_diffrn_reflns_av_R_equivalents   0.0443
_diffrn_reflns_av_sigmaI/netI     0.0409
_diffrn_reflns_limit_h_min        -7
_diffrn_reflns_limit_h_max        7
_diffrn_reflns_limit_k_min        -26
_diffrn_reflns_limit_k_max        27
_diffrn_reflns_limit_l_min        -12
_diffrn_reflns_limit_l_max        12
_diffrn_reflns_theta_min          1.78
_diffrn_reflns_theta_max          24.99
_reflns_number_total              2706
_reflns_number_gt                 2041
_reflns_threshold_expression      I>2\s(I)

_computing_data_collection        'Bruker SMART'
_computing_cell_refinement        'Bruker SAINT'
_computing_data_reduction         'Bruker SAINT'
_computing_structure_solution     'Bruker SHELXTL'
_computing_structure_refinement   'Bruker SHELXTL'
_computing_molecular_graphics     'Bruker SHELXTL'
_computing_publication_material   'Bruker SHELXTL and local programs'

_refine_special_details
;
 Refinement of F^2^ against ALL reflections.  The weighted R-factor wR and
 goodness of fit S are based on F^2^, conventional R-factors R are based
 on F, with F set to zero for negative F^2^. The threshold expression of
 F^2^ > 2sigma(F^2^) is used only for calculating R-factors(gt) etc. and is
 not relevant to the choice of reflections for refinement.  R-factors based
 on F^2^ are statistically about twice as large as those based on F, and R-
 factors based on ALL data will be even larger.
;

_refine_ls_structure_factor_coef  Fsqd
_refine_ls_matrix_type            full
_refine_ls_weighting_scheme       calc
_refine_ls_weighting_details
 'calc w=1/[\s^2^(Fo^2^)+(0.0542P)^2^+13.5055P] where P=(Fo^2^+2Fc^2^)/3'
_atom_sites_solution_primary      direct
_atom_sites_solution_secondary    difmap
_atom_sites_solution_hydrogens    geom
_refine_ls_hydrogen_treatment     constr
_refine_ls_extinction_method      none
_refine_ls_extinction_coef        ?
_refine_ls_number_reflns          2706
_refine_ls_number_parameters      237
_refine_ls_number_restraints      70
_refine_ls_R_factor_all           0.1185
_refine_ls_R_factor_gt            0.0970
_refine_ls_wR_factor_ref          0.2635
_refine_ls_wR_factor_gt           0.2538
_refine_ls_goodness_of_fit_ref    1.187
_refine_ls_restrained_S_all       1.172
_refine_ls_shift/su_max           0.000
_refine_ls_shift/su_mean          0.000

loop_
 _atom_site_label
 _atom_site_type_symbol
 _atom_site_fract_x
 _atom_site_fract_y
 _atom_site_fract_z
 _atom_site_U_iso_or_equiv
 _atom_site_adp_type
 _atom_site_occupancy
 _atom_site_symmetry_multiplicity
 _atom_site_calc_flag
 _atom_site_refinement_flags
 _atom_site_disorder_assembly
 _atom_site_disorder_group
N1A N 0.5495(8) 0.3501(2) 0.3455(5) 0.0292(13) Uani 1 1 d . A .
C1 C 0.5267(11) 0.2856(3) 0.3304(8) 0.0372(17) Uani 1 1 d U . .
H1A H 0.4517 0.2764 0.2449 0.045 Uiso 0.54(2) 1 calc PR A 1
H1B H 0.4506 0.2697 0.4022 0.045 Uiso 0.54(2) 1 calc PR A 1
H1C H 0.5504 0.2743 0.2388 0.045 Uiso 0.46(2) 1 d PR A 2
H1D H 0.3873 0.2744 0.3463 0.045 Uiso 0.46(2) 1 d PR A 2
C2 C 0.732(2) 0.2583(6) 0.3359(18) 0.040(4) Uani 0.54(2) 1 d PU A 1
H2A H 0.7199 0.2152 0.3279 0.048 Uiso 0.54(2) 1 calc PR A 1
H2B H 0.8056 0.2728 0.2614 0.048 Uiso 0.54(2) 1 calc PR A 1
C3 C 0.846(3) 0.2736(12) 0.463(2) 0.038(5) Uani 0.54(2) 1 d PU A 1
H3A H 0.9799 0.2545 0.4715 0.046 Uiso 0.54(2) 1 calc PR A 1
H3B H 0.7713 0.2622 0.5396 0.046 Uiso 0.54(2) 1 calc PR A 1
C2X C 0.675(3) 0.2531(7) 0.428(2) 0.042(5) Uani 0.46(2) 1 d PU A 2
H2C H 0.6346 0.2587 0.5190 0.050 Uiso 0.46(2) 1 calc PR A 2
H2D H 0.6698 0.2106 0.4083 0.050 Uiso 0.46(2) 1 calc PR A 2
C3X C 0.887(4) 0.2753(13) 0.420(2) 0.034(5) Uani 0.46(2) 1 d PU A 2
H3C H 0.9831 0.2551 0.4838 0.041 Uiso 0.46(2) 1 calc PR A 2
H3D H 0.9317 0.2705 0.3296 0.041 Uiso 0.46(2) 1 calc PR A 2
N4 N 0.8656(10) 0.3386(3) 0.4542(7) 0.0470(17) Uani 1 1 d U . .
H4 H 0.9815 0.3548 0.4802 0.056 Uiso 1 1 calc R A 1
C4A C 0.7164(11) 0.3726(3) 0.4086(7) 0.0310(16) Uani 1 1 d . A .
C5 C 0.7396(11) 0.4350(3) 0.4224(7) 0.0347(17) Uani 1 1 d . . .
H5 H 0.8581 0.4507 0.4669 0.042 Uiso 1 1 calc R A .
C6 C 0.5946(11) 0.4706(3) 0.3725(7) 0.0348(17) Uani 1 1 d . A .
H6 H 0.6126 0.5118 0.3798 0.042 Uiso 1 1 calc R . .
C7A C 0.4116(11) 0.4478(3) 0.3079(7) 0.0307(16) Uani 1 1 d . . .
C7 C 0.2584(12) 0.4839(3) 0.2544(7) 0.0381(18) Uani 1 1 d . A .
H7 H 0.2717 0.5252 0.2622 0.046 Uiso 1 1 calc R . .
C8 C 0.0872(12) 0.4604(3) 0.1900(7) 0.0410(19) Uani 1 1 d . . .
H8 H -0.0171 0.4855 0.1545 0.049 Uiso 1 1 calc R A .
C9 C 0.0673(11) 0.4004(3) 0.1771(7) 0.0359(17) Uani 1 1 d . A .
C10 C 0.2198(10) 0.3633(3) 0.2280(7) 0.0330(16) Uani 1 1 d . . .
H10 H 0.2056 0.3222 0.2181 0.040 Uiso 1 1 calc R A .
C10A C 0.3935(11) 0.3866(3) 0.2934(6) 0.0306(16) Uani 1 1 d . A .
O1 O -0.0957(8) 0.3724(2) 0.1164(5) 0.0460(14) Uani 1 1 d . . .
C11 C -0.2486(13) 0.4081(4) 0.0488(8) 0.055(2) Uani 1 1 d . A .
H11A H -0.3037 0.4351 0.1118 0.082 Uiso 1 1 calc R . .
H11B H -0.3563 0.3831 0.0092 0.082 Uiso 1 1 calc R . .
H11C H -0.1899 0.4307 -0.0207 0.082 Uiso 1 1 calc R . .
C12 C 1.2114(12) 0.3690(3) 0.8233(8) 0.0397(18) Uani 1 1 d . . .
F1 F 1.2796(8) 0.3308(2) 0.9163(4) 0.0573(14) Uani 1 1 d . . .
F2 F 1.2515(9) 0.4224(2) 0.8719(5) 0.0680(17) Uani 1 1 d . . .
F3 F 1.0108(8) 0.3641(3) 0.8111(6) 0.0755(18) Uani 1 1 d . . .
S1 S 1.3165(3) 0.35685(8) 0.66859(18) 0.0332(5) Uani 1 1 d . . .
O2 O 1.2116(8) 0.3990(2) 0.5823(5) 0.0432(14) Uani 1 1 d . . .
O3 O 1.2638(10) 0.2969(2) 0.6379(6) 0.0566(18) Uani 1 1 d . . .
O4 O 1.5265(8) 0.3681(3) 0.6960(6) 0.0523(16) Uani 1 1 d . . .

loop_
 _atom_site_aniso_label
 _atom_site_aniso_U_11
 _atom_site_aniso_U_22
 _atom_site_aniso_U_33
 _atom_site_aniso_U_23
 _atom_site_aniso_U_13
 _atom_site_aniso_U_12
N1A 0.033(3) 0.023(3) 0.031(3) -0.002(2) 0.001(2) -0.004(2)
C1 0.033(4) 0.027(4) 0.050(5) -0.006(3) -0.006(3) -0.003(3)
C2 0.039(7) 0.031(7) 0.049(10) -0.005(6) -0.007(7) 0.005(6)
C3 0.034(10) 0.037(6) 0.042(11) 0.005(10) 0.001(7) -0.001(8)
C2X 0.038(9) 0.031(8) 0.054(11) 0.013(7) -0.007(8) -0.008(6)
C3X 0.036(9) 0.033(7) 0.034(12) 0.010(9) 0.003(9) -0.005(8)
N4 0.044(4) 0.037(3) 0.058(4) -0.005(3) -0.015(3) -0.005(3)
C4A 0.034(4) 0.031(4) 0.027(4) -0.002(3) 0.000(3) -0.008(3)
C5 0.039(4) 0.037(4) 0.029(4) -0.006(3) 0.005(3) -0.017(3)
C6 0.044(4) 0.028(4) 0.034(4) -0.006(3) 0.006(3) -0.009(3)
C7A 0.035(4) 0.029(4) 0.029(4) 0.003(3) 0.009(3) -0.004(3)
C7 0.053(5) 0.030(4) 0.034(4) 0.002(3) 0.018(4) 0.002(4)
C8 0.045(5) 0.043(5) 0.036(4) 0.011(3) 0.007(4) 0.009(4)
C9 0.034(4) 0.046(5) 0.028(4) 0.008(3) 0.003(3) 0.001(3)
C10 0.037(4) 0.029(4) 0.033(4) 0.005(3) 0.001(3) -0.004(3)
C10A 0.036(4) 0.035(4) 0.020(3) 0.001(3) 0.000(3) -0.003(3)
O1 0.037(3) 0.054(4) 0.045(3) 0.007(3) -0.008(2) 0.002(3)
C11 0.050(5) 0.073(6) 0.039(5) 0.009(4) -0.007(4) 0.013(5)
C12 0.043(5) 0.036(4) 0.040(4) 0.002(3) 0.002(3) 0.014(3)
F1 0.084(4) 0.054(3) 0.034(3) 0.010(2) 0.007(2) 0.016(3)
F2 0.116(5) 0.040(3) 0.047(3) -0.010(2) -0.002(3) 0.024(3)
F3 0.043(3) 0.106(5) 0.079(4) 0.018(4) 0.019(3) 0.012(3)
S1 0.0347(10) 0.0343(10) 0.0297(9) -0.0013(7) -0.0037(7) 0.0013(8)
O2 0.051(3) 0.036(3) 0.039(3) 0.008(2) -0.015(3) -0.009(2)
O3 0.085(5) 0.032(3) 0.048(3) -0.009(3) -0.026(3) 0.014(3)
O4 0.031(3) 0.076(4) 0.049(3) 0.012(3) -0.002(2) -0.007(3)

_geom_special_details
;
 All esds (except the esd in the dihedral angle between two l.s. planes)
 are estimated using the full covariance matrix.  The cell esds are taken
 into account individually in the estimation of esds in distances, angles
 and torsion angles; correlations between esds in cell parameters are only
 used when they are defined by crystal symmetry.  An approximate (isotropic)
 treatment of cell esds is used for estimating esds involving l.s. planes.
;

loop_
 _geom_bond_atom_site_label_1
 _geom_bond_atom_site_label_2
 _geom_bond_distance
 _geom_bond_site_symmetry_2
 _geom_bond_publ_flag
N1A C4A 1.343(9) . ?
N1A C10A 1.403(9) . ?
N1A C1 1.488(8) . ?
C1 C2 1.505(16) . ?
C1 C2X 1.535(18) . ?
C2 C3 1.49(3) . ?
C3 N4 1.49(3) . ?
C2X C3X 1.52(3) . ?
C3X N4 1.50(3) . ?
N4 C4A 1.317(9) . ?
C4A C5 1.438(10) . ?
C5 C6 1.333(10) . ?
C6 C7A 1.438(10) . ?
C7A C7 1.390(10) . ?
C7A C10A 1.410(10) . ?
C7 C8 1.379(11) . ?
C8 C9 1.381(11) . ?
C9 O1 1.367(9) . ?
C9 C10 1.392(10) . ?
C10 C10A 1.394(10) . ?
O1 C11 1.439(9) . ?
C12 F2 1.335(9) . ?
C12 F1 1.339(8) . ?
C12 F3 1.340(9) . ?
C12 S1 1.792(8) . ?
S1 O4 1.431(6) . ?
S1 O3 1.442(6) . ?
S1 O2 1.444(5) . ?

loop_
 _geom_angle_atom_site_label_1
 _geom_angle_atom_site_label_2
 _geom_angle_atom_site_label_3
 _geom_angle
 _geom_angle_site_symmetry_1
 _geom_angle_site_symmetry_3
 _geom_angle_publ_flag
C4A N1A C10A 121.0(6) . . ?
C4A N1A C1 120.1(6) . . ?
C10A N1A C1 118.8(5) . . ?
N1A C1 C2 108.7(8) . . ?
N1A C1 C2X 110.9(8) . . ?
C3 C2 C1 109.7(15) . . ?
C2 C3 N4 102.6(18) . . ?
C3X C2X C1 111.0(16) . . ?
N4 C3X C2X 102(2) . . ?
C4A N4 C3 122.8(11) . . ?
C4A N4 C3X 124.9(12) . . ?
N4 C4A N1A 121.2(6) . . ?
N4 C4A C5 118.5(6) . . ?
N1A C4A C5 120.3(7) . . ?
C6 C5 C4A 119.9(7) . . ?
C5 C6 C7A 121.1(7) . . ?
C7 C7A C10A 119.5(7) . . ?
C7 C7A C6 122.4(7) . . ?
C10A C7A C6 118.0(7) . . ?
C8 C7 C7A 120.7(7) . . ?
C7 C8 C9 120.0(7) . . ?
O1 C9 C8 125.1(7) . . ?
O1 C9 C10 114.5(7) . . ?
C8 C9 C10 120.4(7) . . ?
C9 C10 C10A 120.1(7) . . ?
C10 C10A N1A 121.2(6) . . ?
C10 C10A C7A 119.2(7) . . ?
N1A C10A C7A 119.6(6) . . ?
C9 O1 C11 117.3(6) . . ?
F2 C12 F1 106.7(6) . . ?
F2 C12 F3 106.3(6) . . ?
F1 C12 F3 106.9(7) . . ?
F2 C12 S1 112.6(6) . . ?
F1 C12 S1 112.5(5) . . ?
F3 C12 S1 111.3(6) . . ?
O4 S1 O3 115.6(4) . . ?
O4 S1 O2 114.7(3) . . ?
O3 S1 O2 113.8(3) . . ?
O4 S1 C12 104.3(4) . . ?
O3 S1 C12 103.4(4) . . ?
O2 S1 C12 103.0(3) . . ?

loop_
 _geom_torsion_atom_site_label_1
 _geom_torsion_atom_site_label_2
 _geom_torsion_atom_site_label_3
 _geom_torsion_atom_site_label_4
 _geom_torsion
 _geom_torsion_site_symmetry_1
 _geom_torsion_site_symmetry_2
 _geom_torsion_site_symmetry_3
 _geom_torsion_site_symmetry_4
 _geom_torsion_publ_flag
C4A N1A C1 C2 -25.3(12) . . . . ?
C10A N1A C1 C2 155.1(9) . . . . ?
C4A N1A C1 C2X 17.6(13) . . . . ?
C10A N1A C1 C2X -162.0(11) . . . . ?
N1A C1 C2 C3 58.2(18) . . . . ?
C2X C1 C2 C3 -42.4(16) . . . . ?
C1 C2 C3 N4 -63.9(18) . . . . ?
N1A C1 C2X C3X -52(2) . . . . ?
C2 C1 C2X C3X 43.0(17) . . . . ?
C1 C2X C3X N4 60(2) . . . . ?
C2 C3 N4 C4A 42.5(19) . . . . ?
C2 C3 N4 C3X -60(5) . . . . ?
C2X C3X N4 C4A -44(2) . . . . ?
C2X C3X N4 C3 48(5) . . . . ?
C3 N4 C4A N1A -12.4(15) . . . . ?
C3X N4 C4A N1A 12.7(16) . . . . ?
C3 N4 C4A C5 170.6(12) . . . . ?
C3X N4 C4A C5 -164.3(13) . . . . ?
C10A N1A C4A N4 -178.0(7) . . . . ?
C1 N1A C4A N4 2.4(10) . . . . ?
C10A N1A C4A C5 -1.0(10) . . . . ?
C1 N1A C4A C5 179.5(6) . . . . ?
N4 C4A C5 C6 177.3(7) . . . . ?
N1A C4A C5 C6 0.2(11) . . . . ?
C4A C5 C6 C7A 1.7(11) . . . . ?
C5 C6 C7A C7 -179.6(7) . . . . ?
C5 C6 C7A C10A -2.8(10) . . . . ?
C10A C7A C7 C8 1.5(10) . . . . ?
C6 C7A C7 C8 178.2(7) . . . . ?
C7A C7 C8 C9 -0.5(11) . . . . ?
C7 C8 C9 O1 179.5(7) . . . . ?
C7 C8 C9 C10 -0.5(11) . . . . ?
O1 C9 C10 C10A -179.4(6) . . . . ?
C8 C9 C10 C10A 0.6(11) . . . . ?
C9 C10 C10A N1A -179.9(6) . . . . ?
C9 C10 C10A C7A 0.4(10) . . . . ?
C4A N1A C10A C10 -179.9(6) . . . . ?
C1 N1A C10A C10 -0.3(10) . . . . ?
C4A N1A C10A C7A -0.2(10) . . . . ?
C1 N1A C10A C7A 179.4(6) . . . . ?
C7 C7A C10A C10 -1.4(10) . . . . ?
C6 C7A C10A C10 -178.3(6) . . . . ?
C7 C7A C10A N1A 178.9(6) . . . . ?
C6 C7A C10A N1A 2.0(10) . . . . ?
C8 C9 O1 C11 6.9(11) . . . . ?
C10 C9 O1 C11 -173.2(7) . . . . ?
F2 C12 S1 O4 56.3(6) . . . . ?
F1 C12 S1 O4 -64.4(6) . . . . ?
F3 C12 S1 O4 175.6(5) . . . . ?
F2 C12 S1 O3 177.5(5) . . . . ?
F1 C12 S1 O3 56.8(6) . . . . ?
F3 C12 S1 O3 -63.2(6) . . . . ?
F2 C12 S1 O2 -63.8(6) . . . . ?
F1 C12 S1 O2 175.6(5) . . . . ?
F3 C12 S1 O2 55.5(6) . . . . ?

loop_
 _geom_hbond_atom_site_label_D
 _geom_hbond_atom_site_label_H
 _geom_hbond_atom_site_label_A
 _geom_hbond_distance_DH
 _geom_hbond_distance_HA
 _geom_hbond_distance_DA
 _geom_hbond_angle_DHA
 _geom_hbond_site_symmetry_A
N4 H4 O2  0.88 2.05 2.908(8) 165.0 .

_diffrn_measured_fraction_theta_max    0.999
_diffrn_reflns_theta_full              24.99
_diffrn_measured_fraction_theta_full   0.999
_refine_diff_density_max    1.007
_refine_diff_density_min   -0.378
_refine_diff_density_rms    0.112
